# Supplementary material for: On the Optical Properties of Cr2Ge2Te6 and Its Heterostructure
Source: MDPI journal article supplement (doi:10.3390/condmat8030059), 2023-07-14
Supplement: s1 [file s1]

*Supplementary information*  
*for*  
**On the optical properties of Cr<sub>2</sub>Ge<sub>2</sub>Te<sub>6</sub> and its heterostructure**

Hiroshi Idzuchi<sup>1-4\*</sup>, Andres E Llacsahuanga Alilcca<sup>4</sup>, Amanda Victo Haglund<sup>5</sup>, Xing-Chen Pan<sup>2</sup>, Takuya Matsuda<sup>1</sup>, Katsumi Tanigaki<sup>2,5</sup>, David Mandrus<sup>6,7</sup>, and Yong P Chen<sup>2-4,8,9</sup>

<sup>1</sup> *Department of Physics, The University of Tokyo, Bunkyo-ku, Tokyo 113-0033, Japan*

<sup>2</sup> *WPI Advanced Institute for Materials Research (AIMR), Tohoku University, Sendai 980-8577, Japan.*

<sup>3</sup> *Center for Science and Innovation in Spintronics (CSIS), Tohoku University, Sendai 980-8577, Japan.*

<sup>4</sup> *Department of Physics and Astronomy, Purdue University, West Lafayette, Indiana 47907, USA.*

<sup>5</sup> *Beijing Academy of Quantum Information and Sciences, Beijing 100193, China.*

<sup>6</sup> *Department of Materials Science and Engineering, University of Tennessee, Knoxville, TN 37996, USA.*

<sup>7</sup> *Materials Science and Technology Division, Oak Ridge National Laboratory, Oak Ridge, TN 37831, USA.*

<sup>8</sup> *School of Electrical and Computer Engineering and Birck Nanotechnology Center and Purdue Quantum Science and Engineering Institute, Purdue University, West Lafayette, Indiana 47907, USA.*

<sup>9</sup> *Institute of Physics and Astronomy and Villum Centers for Dirac Materials and for Hybrid Quantum Materials and Devices, Aarhus University, 8000 Aarhus-C, Denmark.*

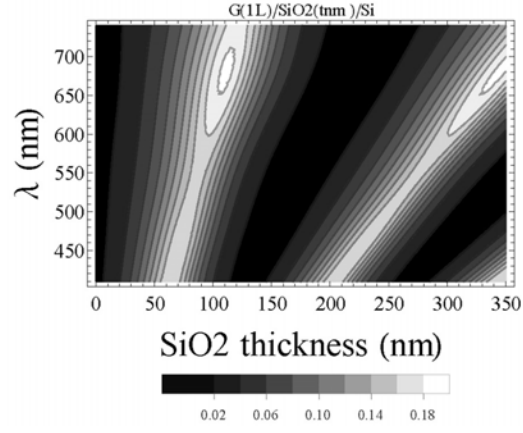

**FIG. S1** Calculation on wavelength-dependent contrast ( $R[n_1 = 1] - R[n_1 = n_{\text{flake}}]$ ) /  $R[n_1 = 1]$  for Si/SiO<sub>2</sub>/graphene(monolayer). The thickness of SiO<sub>2</sub> layer is varied from 0 nm to 350 nm.

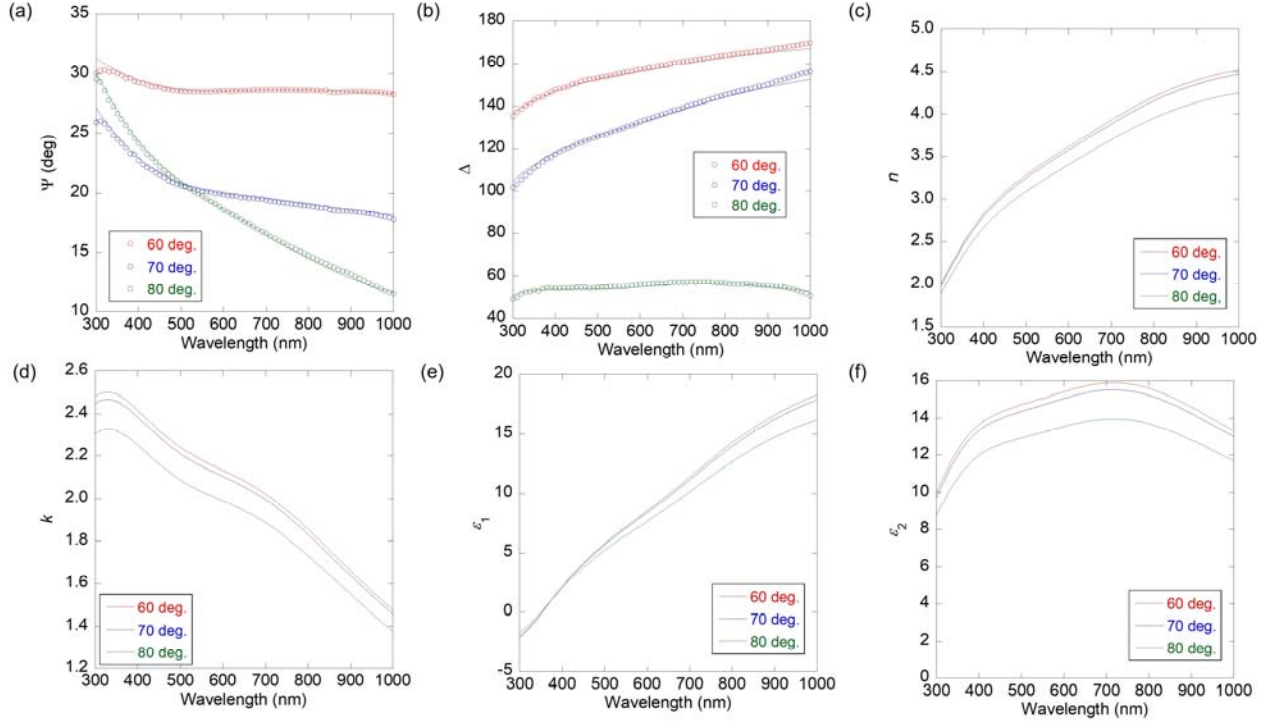

**FIG. S2|** (a,b) Ellipsometry characterization experiment for bulk  $\text{Cr}_2\text{Ge}_2\text{Te}_6$  crystal. Wavelength dependence of  $\Psi$  (angle difference of the polarization between incident and detected light delay see the instruction on ellipsometry) and delta (the phase difference of the polarization of incident and reflected light). (c-f) Calculated  $n$ ,  $k$ ,  $\epsilon_1$ ,  $\epsilon_2$  based on the model described in the text.  $n$  ( $k$ ) represents real (imaginary) part of the refractive index.  $\epsilon_1$  ( $\epsilon_2$ ) represents real (imaginary) part of the dielectric function. 60 (70,80) deg. corresponds to incident angle (form the normal to the sample plane)
